# Supplementary material for: Stable kinetochore‐microtubule attachment requires loop‐dependent Ndc80‐Ndc80 binding
Source: PubMed Central journal article supplement — EMBO J. 2023 May 19;42(13):e112504. doi: 10.15252/embj.2022112504 (PMC10308368; doi:10.15252/embj.2022112504), 2023-05-19
Supplement: EMBJ-42-e112504-s006.pdf [file EMBJ-42-e112504-s006.pdf]

## Expanded View Figures

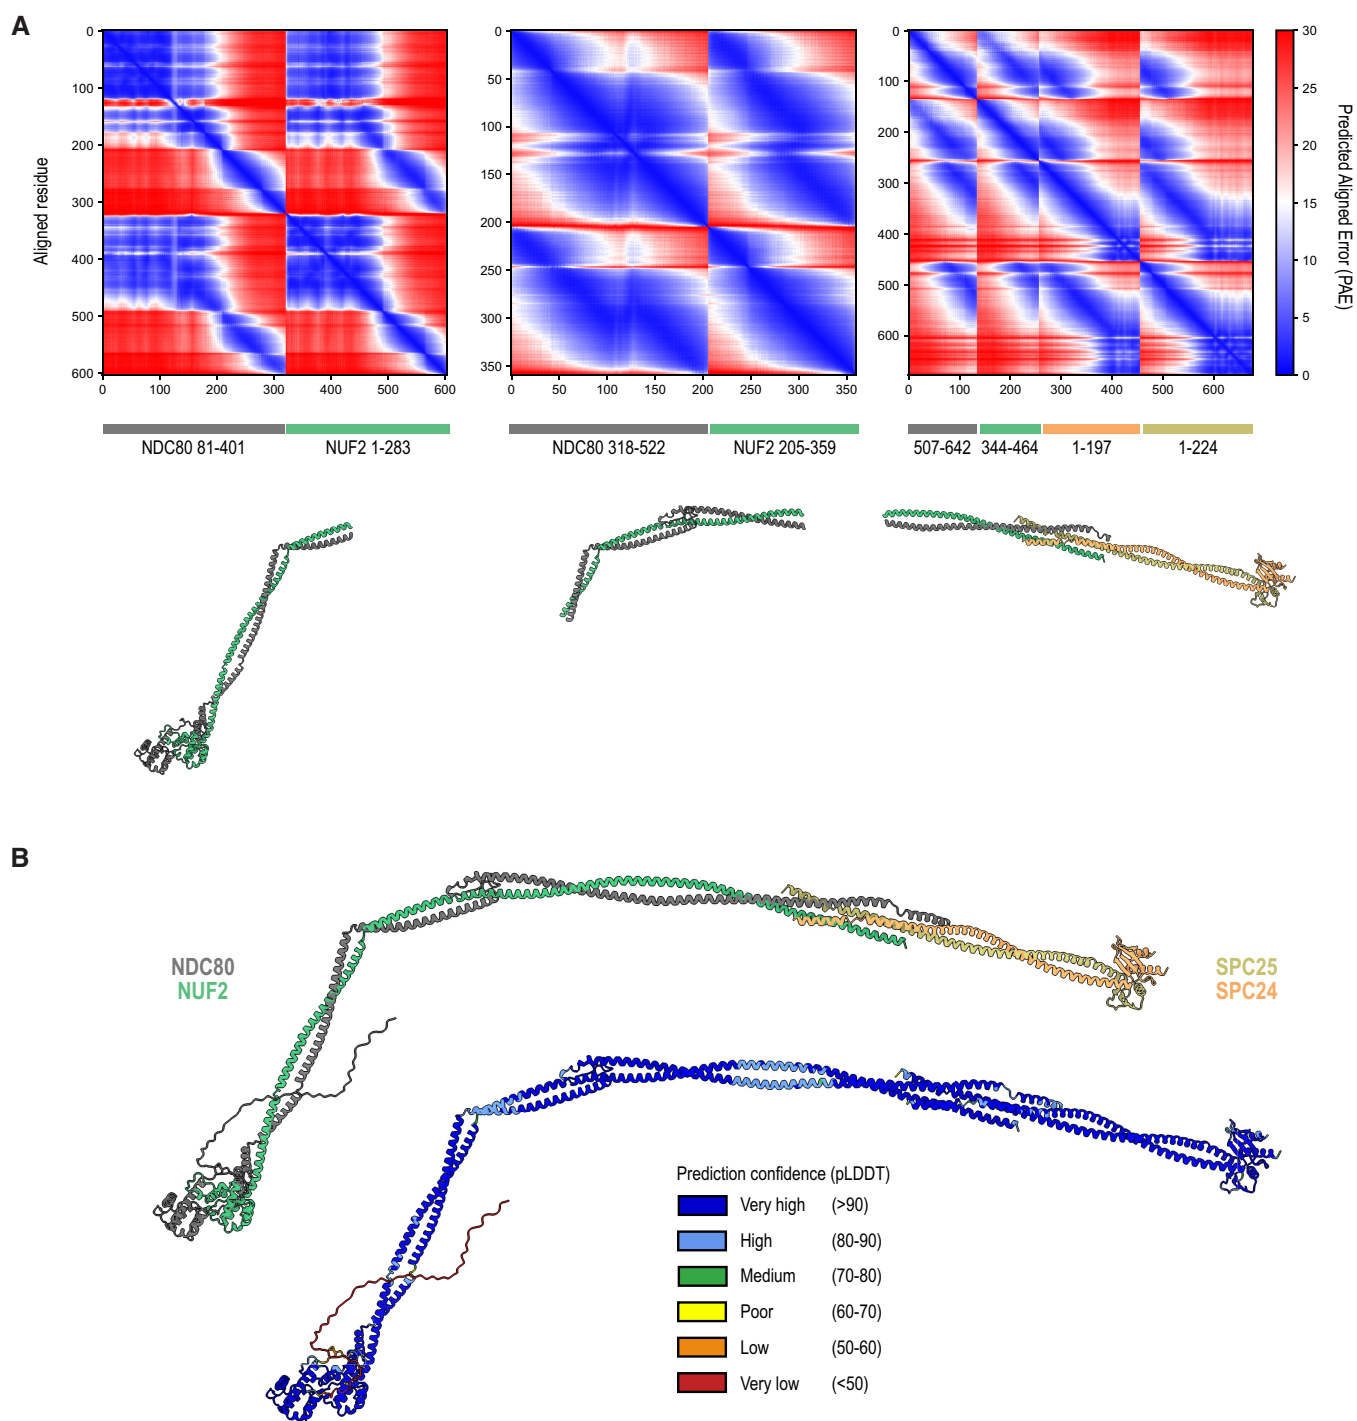

Figure EV1.

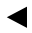**Figure EV1. Structural *in silico* analysis of the human Ndc80 complex.**

- A Boundaries and Predicted Aligned Error (PAE) scores of the three Ndc80 segments that were predicted by AF2 multimer. These fragments were used to generate a composite prediction of the full-length Ndc80 complex. More information can be found in the [Materials and Methods](#) section.
- B The prediction of the full-length Ndc80 complexes with colors representing the different subunits (as in Fig 1B) and the local prediction confidence intervals.

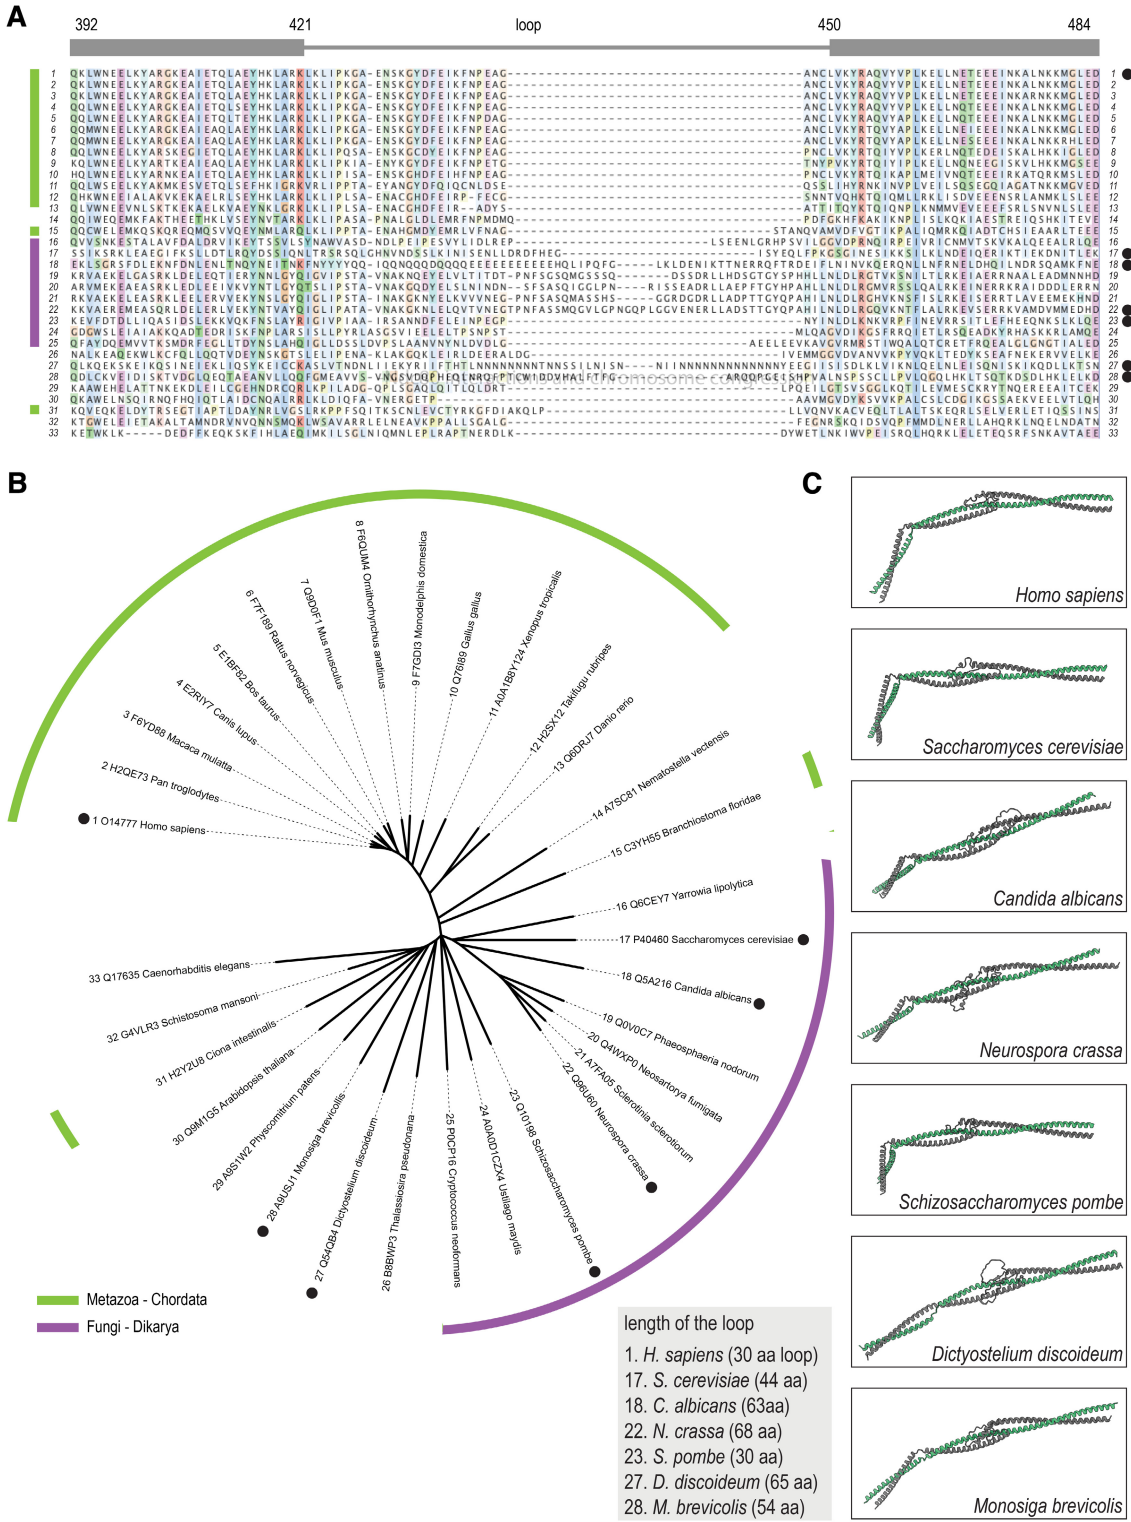

Figure EV2.

**Figure EV2. Alignments, phylogenetic tree, and structural conservation of the Ndc80 kink and loop.**

- A Sequence alignment of the loop region of the NDC80 subunit in various species. Residue numbers correspond to the human NDC80.
- B Unrooted phylogenetic tree that was generated with complete NDC80 sequences. Sequences in panel (A) were arranged according to this tree. Species belonging to the Chordata phylum (light green) and the Fungi kingdom (purple) are indicated. Black dots mark species for which we predicted the structure.
- C Predicted structures of the NDC80:NUF2 region spanning the hinge and loop regions. Shown in similar orientations following structural alignment to the human fragment NDC80<sup>376-516</sup>;NUF2<sup>269-356</sup>.

Source data are available online for this figure.

**Figure EV3. Electroporation efficiency and a comparison of loop mutants.**

- A Immunofluorescence quantification of Ndc80, KNL1, and NSL1 at kinetochores following electroporation of different Ndc80 constructs. The number of kinetochores analyzed for NDC80: wt - 758, ΔL - 2,053, M5 - 1,612, KNL1: wt - 697, ΔL - 635, M5 - 602, and NSL1: wt - 647, ΔL - 644, M5 - 611. Red lines indicate median value with interquartile range.
- B Schematic representation of the predicted structure of the NDC80:NUF2 loop region with annotations to illustrate residues with side-chains that pack a hydrophobic core and mutants that interfere with chromosome congression as illustrated in Fig 4E and Wimbish *et al* (2020).
- C Immunofluorescence quantification of various kinetochore proteins in cells that were treated as described in panel (A), but with nocodazole added 15 h after electroporation and 3 h before fixation. The number of kinetochores analyzed for CENP-T: wt - 799, ΔL - 750, M5 - 855, BUB1: wt - 2,226, ΔL - 1,993, M5 - 1,598, and BUBR1: wt - 2,315, ΔL - 2,112, M5 - 1,549. Red lines indicate median value with interquartile range.
- D A new anti-SKA antibody, generated against the full-length recombinant SKA complex, mainly recognizes SKA3 in a HeLa cell lysate using immunoblotting. Asterisks indicate non-specific bands that are not sensitive to depletion of the SKA complex by RNAi.
- E-G The antibody also recognizes SKA by immunofluorescence. SKA levels are higher in MG132 arrested cells than in STLC or nocodazole arrested cells. Scale bar: 5 μm.
- H, I SKA levels recruited to kinetochores in nocodazole-exposed cells with various Ndc80 complexes. Scale bar: 5 μm.

Source data are available online for this figure.



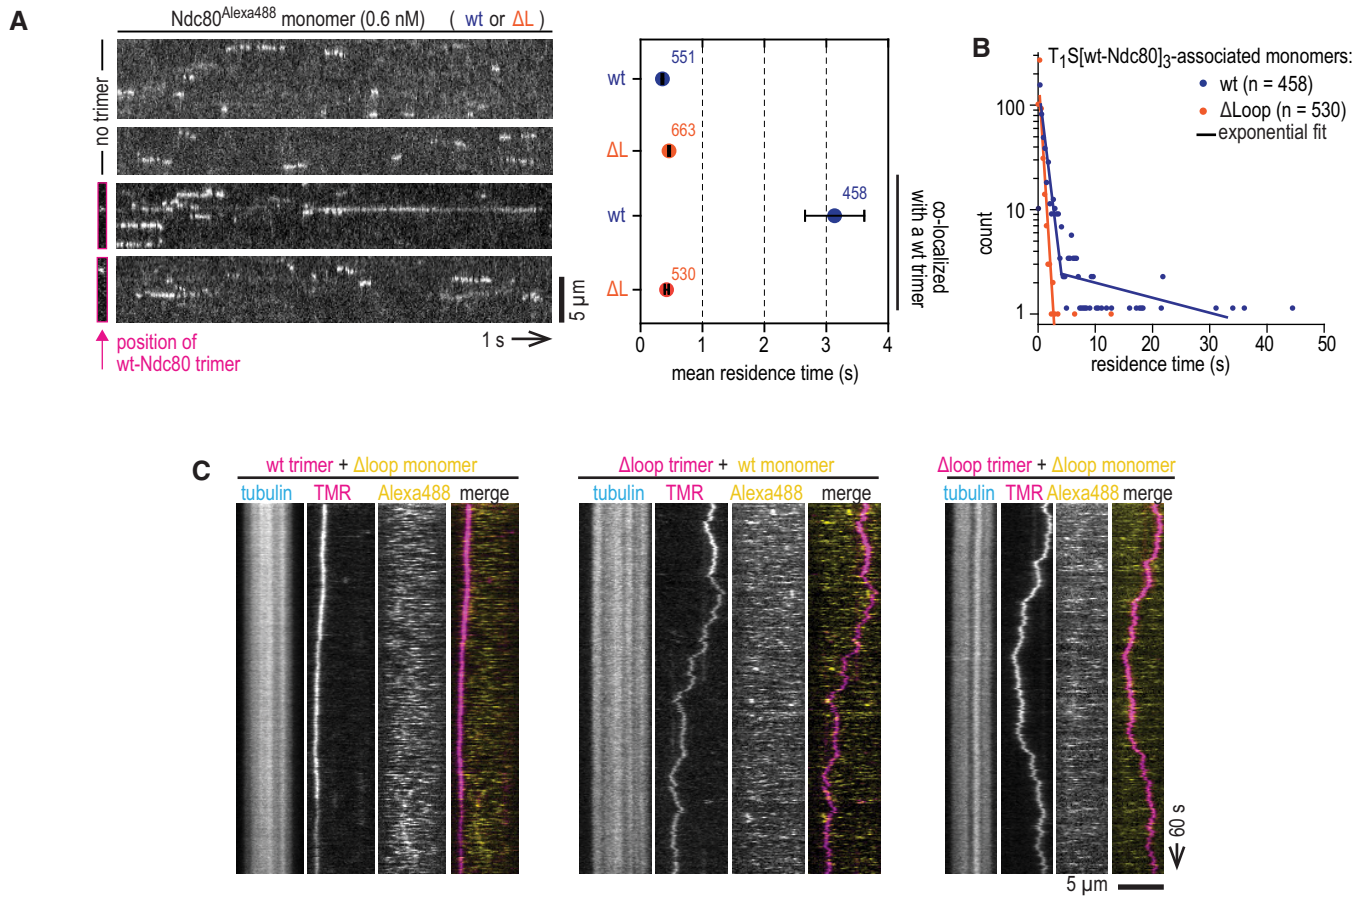

**Figure EV4. Loop-dependent binding between Ndc80 monomers and trimers on microtubules.**

- A Supplementary information for Fig 5A–D. High-speed recordings to quantify residence time of wild-type and loopless Ndc80 monomers. The top two kymographs show a microtubule with monomers binding and unbinding. The lower two kymographs show the binding and unbinding of Ndc80 monomers to a microtubule with a Ndc80 trimer. Since trimers are practically motionless on this timescale, only their initial location was recorded and indicated. Corresponding mean residence times and SEM. are shown. The number of analyzed events is indicated. Scale bar: 5  $\mu$ m.
- B Distribution of residence times of wild-type and loopless Ndc80 monomers associating with microtubule-bound Ndc80 trimers. A single-exponential fit described the residence time of Ndc80<sup>Δloop</sup>, likely corresponding to Ndc80<sup>Δloop</sup>:microtubule off-rates. Residence time of full-length Ndc80 could be fitted with two exponents, likely corresponding to Ndc80:microtubule and Ndc80:trimer:microtubule off-rates.
- C Typical kymographs showing Ndc80 trimers (magenta) and transiently binding Ndc80 monomers (yellow). Scale bars: vertical (100 s), horizontal (5  $\mu$ m).

Source data are available online for this figure.

**Figure EV5. Characterization of AB-849 and AB-850 in vitro.**

- A AB-849 and AB-850 recognize NDC80 in a HeLa cell lysate (lys) using immunoblotting. Recombinant Ndc80 complex (p) was used as a reference (see Fig 6A) Antibody dilutions are indicated and short (top panel) and long (bottom panel) exposures are shown.
- B Experimental workflow to electroporate Ndc80 complexes with AB-849 or AB-850 into cells.
- C The localization of AB-849, AB-850, NDC80, CENP-C, and DNA was analyzed using immunofluorescence microscopy. Representative cells are shown. Scale bar: 10  $\mu$ m.
- D Overview of mutants M15–M20, mutated in the epitope region of AB-849 to further test putative effects of the AB on the SAC.
- E Time spent in mitosis in the presence or absence of nocodazole. Cells were electroporated with various Ndc80 constructs, when indicated following mixture with AB-849 or AB-850. Every dot represents a cell and red lines indicate median values. Effects of AB-849 on the time spent in mitosis were not recapitulated by any of the mutants M15–M20.

Source data are available online for this figure.

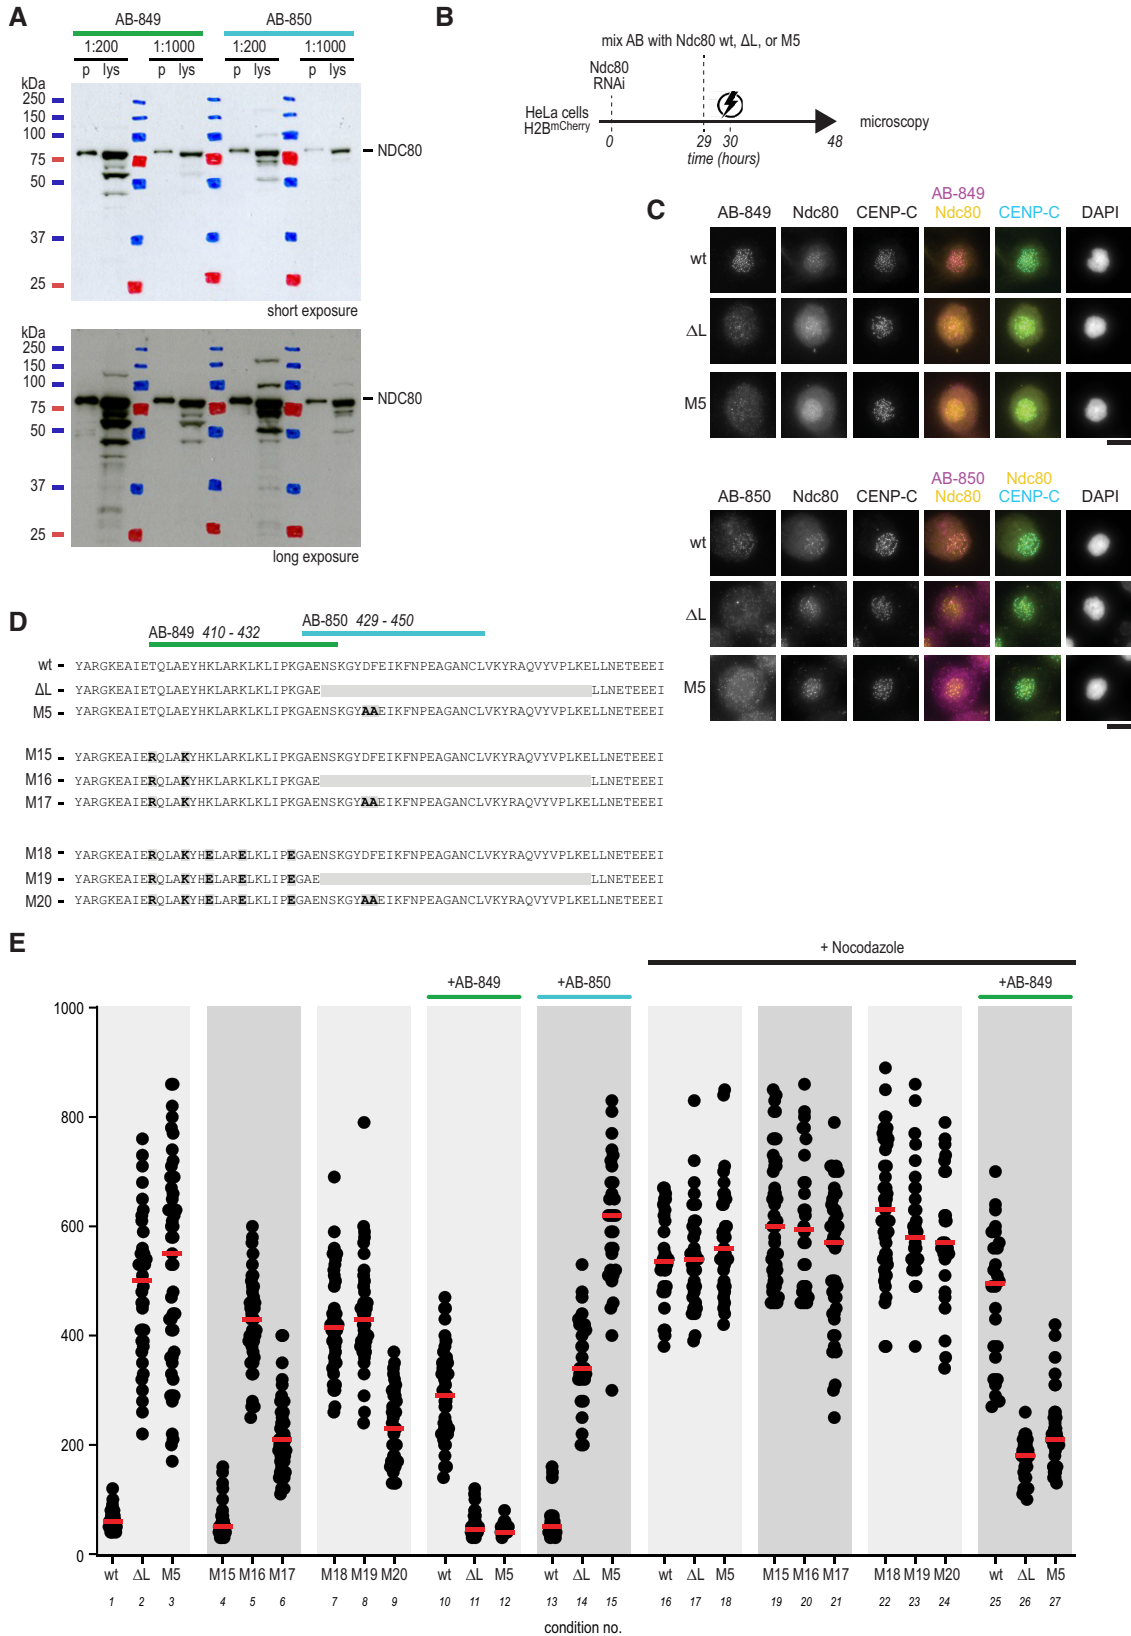

Figure EV5.

# Author Query Form

Journal: EMBJ

Article: 2022112504

Dear Author,

During the copyediting of your manuscript the following queries arose.

Please refer to the query reference callout numbers in the page proofs and respond to each by marking the necessary comments using the PDF annotation tools.

Please remember illegible or unclear comments and corrections may delay publication.

Many thanks for your assistance.

**AUTHOR: Please note that missing content in references have been updated where we have been able to match the missing elements without ambiguity against a standard citation database, to meet the reference style requirements of the journal. It is your responsibility to check and ensure that all listed references are complete and accurate.**

| Query reference | Query | Remarks |
|-----------------|-------|---------|
|-----------------|-------|---------|
